# Supplementary material for: Correlation of Serum Albumin Level to Lung Ultrasound Score and Its Role as Predictors of Outcome in Acute Respiratory Distress Syndrome Patients: A Prospective Observational Study
Source: Hindawi journal article supplement (doi:10.1155/2021/4594790), 2021-12-07
Supplement: f1 [file 4594790.f1.zip]

| sno | Hospital Numt Age | Gender | APACHE II score | SOFA score |
|-----|-------------------|--------|-----------------|------------|
| 1   | 2559693           | 58 M   | 20              | 16         |
| 2   | 3456028           | 46 M   | 11              | 10         |
| 3   | 3454771           | 69 M   | 10              | 5          |
| 4   | 3454102           | 50 M   | 8               | 7          |
| 5   | 3431339           | 56 M   | 28              | 18         |
| 7   | 3446458           | 50 M   | 16              | 16         |
| 8   | 3440311           | 25 M   | 15              | 10         |
| 9   | 3399489           | 36 F   | 17              | 10         |
| 10  | 2982448           | 65 M   | 21              | 7          |
| 11  | 3312648           | 50 F   | 4               | 4          |
| 12  | 3351944           | 56 M   | 16              | 3          |
| 13  | 3424366           | 70 F   | 22              | 8          |
| 14  | 3414704           | 45 M   | 15              | 14         |
| 15  | 3400999           | 32 F   | 4               | 3          |
| 16  | 3174036           | 71 M   | 12              | 4          |
| 17  | 3403649           | 36 M   | 19              | 15         |
| 18  | 3403025           | 49 F   | 19              | 12         |
| 19  | 3400851           | 28 F   | 10              | 6          |
| 20  | 3404095           | 65 F   | 15              | 13         |
| 21  | 3398810           | 32 F   | 20              | 15         |
| 22  | 3409293           | 34 M   | 26              | 10         |
| 23  | 3408273           | 36 M   | 3               | 9          |
| 24  | 3420496           | 30 F   | 12              | 3          |
| 25  | 3417505           | 59 M   | 7               | 6          |
| 26  | 3405313           | 55 M   | 29              | 10         |
| 27  | 3406219           | 68 M   | 25              | 11         |
| 28  | 3404517           | 48 F   | 18              | 11         |
| 30  | 3399701           | 51 M   | 6               | 6          |
| 31  | 3400440           | 57 M   | 19              | 17         |
| 32  | 3400457           | 38 F   | 12              | 12         |
| 33  | 3398327           | 70 M   | 22              | 9          |
| 34  | 3398350           | 40 F   | 2               | 2          |
| 35  | 3428059           | 62 M   | 5               | 5          |
| 36  | 3432284           | 53 F   | 18              | 10         |
| 37  | 3432373           | 55 M   | 16              | 11         |
| 38  | 3463620           | 64 M   | 19              | 14         |
| 39  | 3461200           | 70 M   | 19              | 15         |
| 40  | 3463395           | 58 F   | 14              | 6          |
| 41  | 3454865           | 59 F   | 24              | 16         |
| 42  | 3464730           | 43 M   | 14              | 15         |
| 43  | 2367252           | 63 F   | 25              | 11         |
| 44  | 3465319           | 45 M   | 15              | 12         |
| 46  | 3464252           | 37 M   | 14              | 7          |
| 47  | 3465987           | 54 M   | 19              | 19         |
| 48  | 3458206           | 62 M   | 22              | 11         |

|     |         |      |    |    |
|-----|---------|------|----|----|
| 49  | 3466221 | 50 F | 22 | 14 |
| 50  | 3297288 | 61 M | 23 | 6  |
| 51  | 3488681 | 27 M | 7  | 4  |
| 52  | 3488733 | 38 F | 12 | 9  |
| 53  | 3487108 | 49 M | 22 | 10 |
| 54  | 3467924 | 37 F | 19 | 9  |
| 55  | 3468136 | 60 M | 14 | 10 |
| 56  | 3410927 | 48 M | 13 | 7  |
| 57  | 3465705 | 49 M | 14 | 3  |
| 61  | 3485302 | 54 F | 9  | 5  |
| 62  | 3261441 | 60 M | 14 | 3  |
| 63  | 3457674 | 54 M | 10 | 9  |
| 64  | 3483211 | 68 F | 14 | 6  |
| 66  | 2570479 | 38 M | 16 | 9  |
| 67  | 2686002 | 56 M | 20 | 7  |
| 68  | 3469488 | 44 F | 21 | 9  |
| 69  | 2960456 | 59 F | 23 | 10 |
| 70  | 3481538 | 40 M | 10 | 6  |
| 72  | 2694948 | 65 F | 11 | 5  |
| 73  | 3455744 | 65 F | 12 | 2  |
| 74  | 3482444 | 47 F | 15 | 5  |
| 75  | 3480481 | 47 M | 12 | 8  |
| 76  | 3476597 | 47 M | 23 | 10 |
| 77  | 3476168 | 40 M | 19 | 20 |
| 78  | 3476554 | 43 F | 11 | 13 |
| 79  | 2958161 | 55 M | 23 | 13 |
| 80  | 2667286 | 64 M | 22 | 12 |
| 81  | 3473815 | 60 F | 23 | 12 |
| 82  | 3474474 | 45 F | 17 | 16 |
| 84  | 3475124 | 36 F | 18 | 15 |
| 85  | 3475127 | 60 M | 16 | 6  |
| 86  | 3477736 | 37 M | 10 | 6  |
| 88  | 3478512 | 63 M | 27 | 15 |
| 89  | 3479355 | 42 F | 12 | 12 |
| 90  | 3461774 | 43 M | 20 | 3  |
| 91  | 3425781 | 68 M | 23 | 7  |
| 92  | 3469101 | 69 M | 13 | 13 |
| 93  | 3473935 | 65 F | 14 | 10 |
| 94  | 3479159 | 58 M | 19 | 10 |
| 95  | 3349464 | 56 M | 13 | 6  |
| 96  | 3485313 | 23 F | 9  | 3  |
| 97  | 3465128 | 42 F | 15 | 4  |
| 98  | 3486675 | 41 M | 20 | 12 |
| 99  | 3479939 | 50 M | 28 | 20 |
| 100 | 3488409 | 23 M | 3  | 3  |
| 101 | 3226933 | 64 M | 23 | 12 |
| 102 | 3490590 | 56 M | 12 | 9  |

|     |         |      |    |    |
|-----|---------|------|----|----|
| 103 | 3489559 | 65 M | 18 | 10 |
| 104 | 3489836 | 55 M | 22 | 12 |
| 105 | 3490572 | 50 M | 11 | 6  |
| 106 | 3487839 | 66 M | 22 | 15 |
| 107 | 3487828 | 54 M | 17 | 2  |
| 108 | 3488454 | 70 F | 14 | 7  |
| 109 | 3487839 | 66 F | 23 | 11 |
| 110 | 2919727 | 31 F | 26 | 9  |

| ARDS category - Mil | PaO <sub>2</sub> /FiO <sub>2</sub> ratio | LUSS(Global) | LUSS (Basal) | LUSS(Basal) score as a p |    |
|---------------------|------------------------------------------|--------------|--------------|--------------------------|----|
|                     | 1                                        | 290          | 23           | 13                       | 57 |
|                     | 2                                        | 180          | 23           | 12                       | 52 |
|                     | 1                                        | 201          | 16           | 10                       | 63 |
|                     | 1                                        | 248          | 25           | 13                       | 52 |
|                     | 2                                        | 191          | 25           | 16                       | 64 |
|                     | 1                                        | 238          | 18           | 12                       | 67 |
|                     | 2                                        | 146          | 30           | 15                       | 50 |
|                     | 3                                        | 87           | 33           | 17                       | 51 |
|                     | 3                                        | 90           | 30           | 15                       | 50 |
|                     | 3                                        | 59           | 28           | 14                       | 50 |
|                     | 2                                        | 160          | 25           | 14                       | 56 |
|                     | 2                                        | 183          | 23           | 14                       | 61 |
|                     | 2                                        | 150          | 25           | 13                       | 52 |
|                     | 1                                        | 260          | 15           | 9                        | 60 |
|                     | 2                                        | 133          | 24           | 12                       | 50 |
|                     | 1                                        | 240          | 32           | 16                       | 50 |
|                     | 2                                        | 185          | 24           | 12                       | 50 |
|                     | 1                                        | 220          | 19           | 11                       | 58 |
|                     | 3                                        | 80           | 24           | 12                       | 50 |
|                     | 1                                        | 214          | 24           | 12                       | 50 |
|                     | 1                                        | 271          | 16           | 9                        | 56 |
|                     | 2                                        | 120          | 28           | 16                       | 57 |
|                     | 2                                        | 145          | 29           | 15                       | 52 |
|                     | 2                                        | 125          | 27           | 13                       | 48 |
|                     | 3                                        | 83           | 26           | 11                       | 42 |
|                     | 2                                        | 146          | 21           | 11                       | 52 |
|                     | 2                                        | 142          | 30           | 16                       | 53 |
|                     | 2                                        | 116          | 20           | 14                       | 70 |
|                     | 2                                        | 123          | 24           | 12                       | 50 |
|                     | 1                                        | 253          | 24           | 12                       | 50 |
|                     | 2                                        | 195          | 25           | 14                       | 56 |
|                     | 1                                        | 207          | 28           | 16                       | 57 |
|                     | 2                                        | 147          | 25           | 14                       | 56 |
|                     | 3                                        | 79           | 26           | 14                       | 54 |
|                     | 2                                        | 160          | 27           | 14                       | 52 |
|                     | 1                                        | 255          | 22           | 14                       | 64 |
|                     | 3                                        | 90           | 28           | 17                       | 61 |
|                     | 2                                        | 137          | 21           | 15                       | 71 |
|                     | 3                                        | 68           | 27           | 16                       | 59 |
|                     | 2                                        | 158          | 26           | 14                       | 54 |
|                     | 2                                        | 150          | 17           | 9                        | 53 |
|                     | 3                                        | 89           | 24           | 13                       | 54 |
|                     | 1                                        | 223          | 11           | 6                        | 55 |
|                     | 2                                        | 117          | 28           | 16                       | 57 |
|                     | 2                                        | 120          | 22           | 12                       | 55 |

|   |     |    |    |    |
|---|-----|----|----|----|
| 2 | 130 | 27 | 15 | 56 |
| 2 | 137 | 25 | 13 | 52 |
| 2 | 106 | 24 | 14 | 58 |
| 2 | 132 | 24 | 13 | 54 |
| 3 | 85  | 24 | 14 | 58 |
| 1 | 240 | 20 | 12 | 60 |
| 1 | 209 | 17 | 9  | 53 |
| 2 | 195 | 25 | 13 | 52 |
| 3 | 100 | 24 | 12 | 50 |
| 2 | 190 | 24 | 14 | 59 |
| 2 | 118 | 21 | 13 | 62 |
| 1 | 226 | 18 | 11 | 61 |
| 2 | 150 | 26 | 15 | 58 |
| 2 | 164 | 20 | 12 | 60 |
| 1 | 217 | 24 | 13 | 54 |
| 1 | 211 | 27 | 14 | 52 |
| 2 | 137 | 28 | 16 | 57 |
| 1 | 230 | 17 | 10 | 59 |
| 2 | 177 | 25 | 14 | 56 |
| 1 | 228 | 17 | 8  | 47 |
| 2 | 104 | 24 | 12 | 50 |
| 2 | 167 | 21 | 12 | 57 |
| 2 | 134 | 23 | 13 | 57 |
| 2 | 189 | 24 | 13 | 54 |
| 2 | 155 | 30 | 17 | 57 |
| 2 | 190 | 26 | 15 | 58 |
| 2 | 120 | 26 | 16 | 62 |
| 2 | 112 | 24 | 13 | 54 |
| 2 | 145 | 24 | 12 | 50 |
| 2 | 130 | 24 | 15 | 63 |
| 2 | 140 | 22 | 14 | 64 |
| 2 | 132 | 26 | 14 | 54 |
| 2 | 144 | 24 | 14 | 58 |
| 2 | 144 | 23 | 12 | 52 |
| 2 | 160 | 23 | 13 | 57 |
| 3 | 77  | 30 | 17 | 57 |
| 2 | 193 | 22 | 13 | 59 |
| 1 | 211 | 22 | 13 | 59 |
| 1 | 237 | 21 | 12 | 57 |
| 2 | 138 | 28 | 16 | 57 |
| 2 | 171 | 25 | 15 | 60 |
| 1 | 215 | 21 | 10 | 48 |
| 2 | 136 | 28 | 16 | 57 |
| 3 | 92  | 29 | 16 | 55 |
| 2 | 191 | 19 | 13 | 68 |
| 2 | 105 | 30 | 16 | 53 |
| 2 | 112 | 26 | 14 | 54 |

|   |     |    |    |    |
|---|-----|----|----|----|
| 3 | 86  | 26 | 14 | 54 |
| 2 | 104 | 25 | 13 | 52 |
| 3 | 86  | 27 | 14 | 52 |
| 3 | 79  | 23 | 11 | 48 |
| 1 | 203 | 17 | 10 | 59 |
| 2 | 161 | 18 | 12 | 67 |
| 3 | 66  | 26 | 14 | 54 |
| 3 | 65  | 30 | 17 | 57 |

| Serum Albumin | Outcome of ICU stay | Death | Length of ICU stay (Days) |
|---------------|---------------------|-------|---------------------------|
| 2.5           | survived            | 0     | 18                        |
| 2.3           | survived            | 0     | 20                        |
| 2.3           | survived            | 0     | 13                        |
| 3.4           | survived            | 0     | 8                         |
| 2.3           | survived            | 0     | 9                         |
| 2.3           | survived            | 0     | 10                        |
| 1.8           | survived            | 0     | 4                         |
| 3             | survived            | 0     | 18                        |
| 3.1           | EXPIRED             | 1     | 25                        |
| 4.1           | survived            | 0     | 4                         |
| 2.1           | EXPIRED             | 1     | 26                        |
| 2.2           | EXPIRED             | 1     | 5                         |
| 2.9           | survived            | 0     | 10                        |
| 3.6           | survived            | 0     | 4                         |
| 2.9           | survived            | 0     | 17                        |
| 2.9           | survived            | 0     | 4                         |
| 2.5           | survived            | 0     | 4                         |
| 2.2           | survived            | 0     | 4                         |
| 3.4           | survived            | 0     | 13                        |
| 2.7           | survived            | 0     | 8                         |
| 4.4           | survived            | 0     | 8                         |
| 3.1           | survived            | 0     | 12                        |
| 3.8           | survived            | 0     | 13                        |
| 2.5           | survived            | 0     | 11                        |
| 3.6           | survived            | 0     | 10                        |
| 2.8           | survived            | 0     | 6                         |
| 2.5           | survived            | 0     | 10                        |
| 2.1           | survived            | 0     | 7                         |
| 2.7           | EXPIRED             | 1     | 6                         |
| 3.1           | survived            | 0     | 15                        |
| 2             | EXPIRED             | 1     | 7                         |
| 2.9           | survived            | 0     | 8                         |
| 3             | survived            | 0     | 13                        |
| 3             | survived            | 0     | 12                        |
| 2.6           | survived            | 0     | 14                        |
| 2.8           | EXPIRED             | 1     | 5                         |
| 1.7           | EXPIRED             | 1     | 17                        |
| 2.7           | survived            | 0     | 16                        |
| 3.2           | EXPIRED             | 1     | 2                         |
| 2.5           | EXPIRED             | 1     | 5                         |
| 4.7           | EXPIRED             | 1     | 4                         |
| 3.8           | EXPIRED             | 1     | 1                         |
| 2.6           | survived            | 0     | 6                         |
| 3.1           | EXPIRED             | 1     | 1                         |
| 2.7           | survived            | 0     | 12                        |

|              |   |    |
|--------------|---|----|
| 1.8 survived | 0 | 17 |
| 2.9 EXPIRED  | 1 | 10 |
| 4 survived   | 0 | 11 |
| 2.7 EXPIRED  | 1 | 16 |
| 2.7 EXPIRED  | 1 | 2  |
| 2.9 survived | 0 | 9  |
| 2.9 survived | 0 | 4  |
| 3.9 survived | 0 | 6  |
| 3.1 EXPIRED  | 1 | 15 |
| 1.8 survived | 0 | 5  |
| 4.5 survived | 0 | 4  |
| 3.1 survived | 0 | 10 |
| 3.3 survived | 0 | 5  |
| 3.2 EXPIRED  | 1 | 11 |
| 3.8 survived | 0 | 7  |
| 2.8 survived | 0 | 4  |
| 3.3 EXPIRED  | 1 | 2  |
| 3.2 survived | 0 | 28 |
| 3 survived   | 0 | 10 |
| 3.4 survived | 0 | 3  |
| 3.2 EXPIRED  | 1 | 13 |
| 3.4 survived | 0 | 5  |
| 4.6 EXPIRED  | 1 | 2  |
| 3.6 EXPIRED  | 1 | 6  |
| 2.4 survived | 0 | 20 |
| 2.1 EXPIRED  | 1 | 3  |
| 4 survived   | 0 | 7  |
| 2.8 EXPIRED  | 1 | 8  |
| 3.2 survived | 0 | 7  |
| 1.9 EXPIRED  | 1 | 5  |
| 2.6 survived | 0 | 15 |
| 2.6 survived | 0 | 40 |
| 1.8 EXPIRED  | 1 | 15 |
| 2.2 survived | 0 | 10 |
| 1.9 survived | 0 | 13 |
| 3.6 EXPIRED  | 1 | 4  |
| 3.3 survived | 0 | 4  |
| 3 survived   | 0 | 6  |
| 1 survived   | 0 | 9  |
| 2.3 survived | 0 | 18 |
| 2.9 survived | 0 | 11 |
| 2.9 EXPIRED  | 1 | 3  |
| 4.6 EXPIRED  | 1 | 7  |
| 5.2 EXPIRED  | 1 | 2  |
| 3.6 survived | 0 | 3  |
| 4.5 EXPIRED  | 1 | 2  |
| 3.2 Survived | 0 | 12 |



|              |   |    |
|--------------|---|----|
| 2.8 Survived | 0 | 9  |
| 2.5 Survived | 0 | 8  |
| 4 Survived   | 0 | 12 |
| 2.8 EXPIRED  | 1 | 10 |
| 3.4 Survived | 0 | 10 |
| 3.5 Survived | 0 | 7  |
| 1.4 EXPIRED  | 1 | 10 |
| 3.3 EXPIRED  | 1 | 4  |
