# Supplementary material for: Correlation of Serum Albumin Level to Lung Ultrasound Score and Its Role as Predictors of Outcome in Acute Respiratory Distress Syndrome Patients: A Prospective Observational Study
Source: Crit Care Res Pract. 2021 Dec 7;2021:4594790. doi: 10.1155/2021/4594790 (PMC8670905; doi:10.1155/2021/4594790)
Supplement: Supplementary Materials — Data sheet comprising of age, gender, APACHE II score, SOFA score, ARDS category—mild, moderate, or severe—serum albumin on the day of admission to ICU, global and basal lung ultrasound scores, oxygenation in terms of PaO2/FiO2 ratio, length of ICU stay, and outcome in terms of survival is provided as “Data Sheet Albumin.pdf” in the supplementary materials file. The manuscript has been written according to Strengthening the Reporting of Observational Studies in Epidemiology (STROBE) guidelines, which is available as “STROBE_checklist_cross-sectional.docx.” in the supplementary materials file. [file 4594790.f1.zip]

Archive with 2 entries (2 files):
- 4594790.f1/Data Sheet Albumin.pdf
- 4594790.f1/STROBE_checklist_cross-sectional (1).docx
